# Supplementary material for: Challenges Facing Undergraduate Medical Education in Ambulatory Care Clinics at Tertiary Care Hospitals
Source: MDPI journal article supplement (doi:10.3390/healthcare10030496), 2022-03-08
Supplement: s1 [file s1]

## Figure S2. Faculty Survey.

# Challenges facing Undergraduate Medical Education in Ambulatory Care Clinics at Tertiary Care Hospitals

Faculty Version

The journey of going through medical school is full of obstacles. One way to help passing these obstacles is by discovering them first! From this point of view, we got our research question.

We are conducting a study to investigate the challenges our students in years 4 and 5 face in the outpatient department (OPD) at KFSHRC and KKUH, as a tertiary care hospital.

We strongly encourage you to fill this survey, and would highly appreciate your input! Filling the survey will not take you 2-3 mins.

PI: Dr. Fahad Alsohaibani

Email: [REDACTED]

---

**\*Required**

1. Gender: \*

*Mark only one oval.*

☐ Female

☐ Male

2. Age (years): \*

*Mark only one oval.*

- ☐ Below 30
- ☐ 30-39
- ☐ 40-49
- ☐ 50-59
- ☐ 60 and above

3. University: \*

*Mark only one oval.*

- ☐ Alfaisal University
- ☐ King Saud University

4. Academic Title: \*

*Mark only one oval.*

- ☐ Professor
- ☐ Associate Professor
- ☐ Assistant professor
- ☐ Lecturer
- ☐ Clerkship director



Mark only one oval.

- ☐ Internal Medicine (and IM subspecialties)
- ☐ Surgery (and surgical subspecialties)
- ☐ Paediatrics
- ☐ OBGYN
- ☐ Neurosciences
- ☐ Ophthalmology
- ☐ Family medicine
- ☐ ENT
- ☐ Orthopaedics
- ☐ Psychiatry
- ☐ Other:

6. Do you feel comfortable if a medical students attend Ambulatory Care Clinics (ACC) with you

Mark only one oval.

1 2 3 4 5

---

Strongly agree ☐ ☐ ☐ ☐ ☐ Strongly disagree

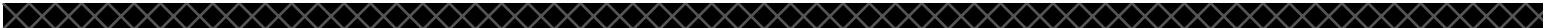

7. Do you think outpatient experience is important for medical students and it should be integrated in the curriculum? \*

*Mark only one oval.*

☐ Yes

☐ No

#### Faculty Perspective: Ambulatory Care Clinics (ACC) Learning Experience

8. From your experience, what are the main challenges/barrier to have proper and efficient medical student education in outpatient settings? \*

*Mark only one oval.*

☐ Environment/institutional-related

☐ Faculty-related

☐ Patient-related

☐ Student-related

☐ Other: \_\_\_\_\_

Please rank the following factors that interfere with outpatient education in order of importance from 1 to 4, where 1 is the most important and 4 is the least important.

9. A. Environment/institutional-related: \*

Mark only one oval per row.

|        | Lack of institutional support | Inappropriate or small clinics rooms | Inadequate structuring and distribution of student in OPD | Inadequate financial incentives for academic staff | Restriction due to COVID-19 |
|--------|-------------------------------|--------------------------------------|-----------------------------------------------------------|----------------------------------------------------|-----------------------------|
| First  | <input type="radio"/>         | <input type="radio"/>                | <input type="radio"/>                                     | <input type="radio"/>                              | <input type="radio"/>       |
| Second | <input type="radio"/>         | <input type="radio"/>                | <input type="radio"/>                                     | <input type="radio"/>                              | <input type="radio"/>       |
| Third  | <input type="radio"/>         | <input type="radio"/>                | <input type="radio"/>                                     | <input type="radio"/>                              | <input type="radio"/>       |
| Fourth | <input type="radio"/>         | <input type="radio"/>                | <input type="radio"/>                                     | <input type="radio"/>                              | <input type="radio"/>       |
| Fifth  | <input type="radio"/>         | <input type="radio"/>                | <input type="radio"/>                                     | <input type="radio"/>                              | <input type="radio"/>       |

10. B. Faculty-related: \*

Mark only one oval per row.

|        | Insufficient time for teaching due to intense patient agenda | Lack of training/retraining for faculty to teach medical students in OPD | Not integrated as part of my current KPI | Not feeling comfortable to have students in my clinic |
|--------|--------------------------------------------------------------|--------------------------------------------------------------------------|------------------------------------------|-------------------------------------------------------|
| First  | <input type="radio"/>                                        | <input type="radio"/>                                                    | <input type="radio"/>                    | <input type="radio"/>                                 |
| Second | <input type="radio"/>                                        | <input type="radio"/>                                                    | <input type="radio"/>                    | <input type="radio"/>                                 |
| Third  | <input type="radio"/>                                        | <input type="radio"/>                                                    | <input type="radio"/>                    | <input type="radio"/>                                 |
| Fourth | <input type="radio"/>                                        | <input type="radio"/>                                                    | <input type="radio"/>                    | <input type="radio"/>                                 |

11. C. Patient-related: \*

Mark only one oval per row.

|        | Patients refusal to be<br>seen by medical<br>students | Lack of suitable<br>patients for<br>teaching | No follow-up/continuity of<br>care for cases attended | Fear of patien<br>dissatisfaction |
|--------|-------------------------------------------------------|----------------------------------------------|-------------------------------------------------------|-----------------------------------|
| First  | <input type="radio"/>                                 | <input type="radio"/>                        | <input type="radio"/>                                 | <input type="radio"/>             |
| Second | <input type="radio"/>                                 | <input type="radio"/>                        | <input type="radio"/>                                 | <input type="radio"/>             |
| Third  | <input type="radio"/>                                 | <input type="radio"/>                        | <input type="radio"/>                                 | <input type="radio"/>             |
| Fourth | <input type="radio"/>                                 | <input type="radio"/>                        | <input type="radio"/>                                 | <input type="radio"/>             |

12. D. Student-related: \*

Mark only one oval per row.

|        | Lack of student's commitment and interest in learning | Increasing numbers of students |
|--------|-------------------------------------------------------|--------------------------------|
| First  | <input type="radio"/>                                 | <input type="radio"/>          |
| Second | <input type="radio"/>                                 | <input type="radio"/>          |

13. Do you support involving medical student in virtual clinics?

Mark only one oval.

|                | 1                     | 2                     | 3                     | 4                     | 5                     |                   |
|----------------|-----------------------|-----------------------|-----------------------|-----------------------|-----------------------|-------------------|
| Strongly agree | <input type="radio"/> | Strongly disagree |
